# Supplementary material for: Highly efficient visible-light-induced photoactivity of the CdS–Mn/MoS2/CdTe/TiO2quaternary photocatalyst for label-free immunoassay of tris-(2,3-dibromopropyl) isocyanurate and enhanced solar hydrogen generation
Source: Royal Society of Chemistry journal article supplement (doi:10.1039/c8ay01050a), 2018-01-01
Supplement: c8ay01050a1.pdf [file c8ay01050a1.pdf]

## Supplementary information

Highly efficient visible-light-induced photoactivity of CdS-  
Mn/MoS<sub>2</sub>/CdTe/TiO<sub>2</sub> quaternary photocatalyst for label-free  
immunoassay of tris-(2,3-dibromopropyl) isocyanurate  
and enhanced solar hydrogen generation

Hui Feng<sup>\*,a,b</sup>, Songbai Zhang<sup>\*,a</sup>, Xiangyang Zhang<sup>a</sup>, Bo Liu<sup>a</sup>, Niu Tang<sup>a</sup>

<sup>a</sup>College of Chemistry and Materials Engineering, Hunan University of Arts and Science,  
Changde, Hunan Province 415000, China

<sup>b</sup>Changsha Environmental Protection College, Hunan Province, Changsha 410082, China

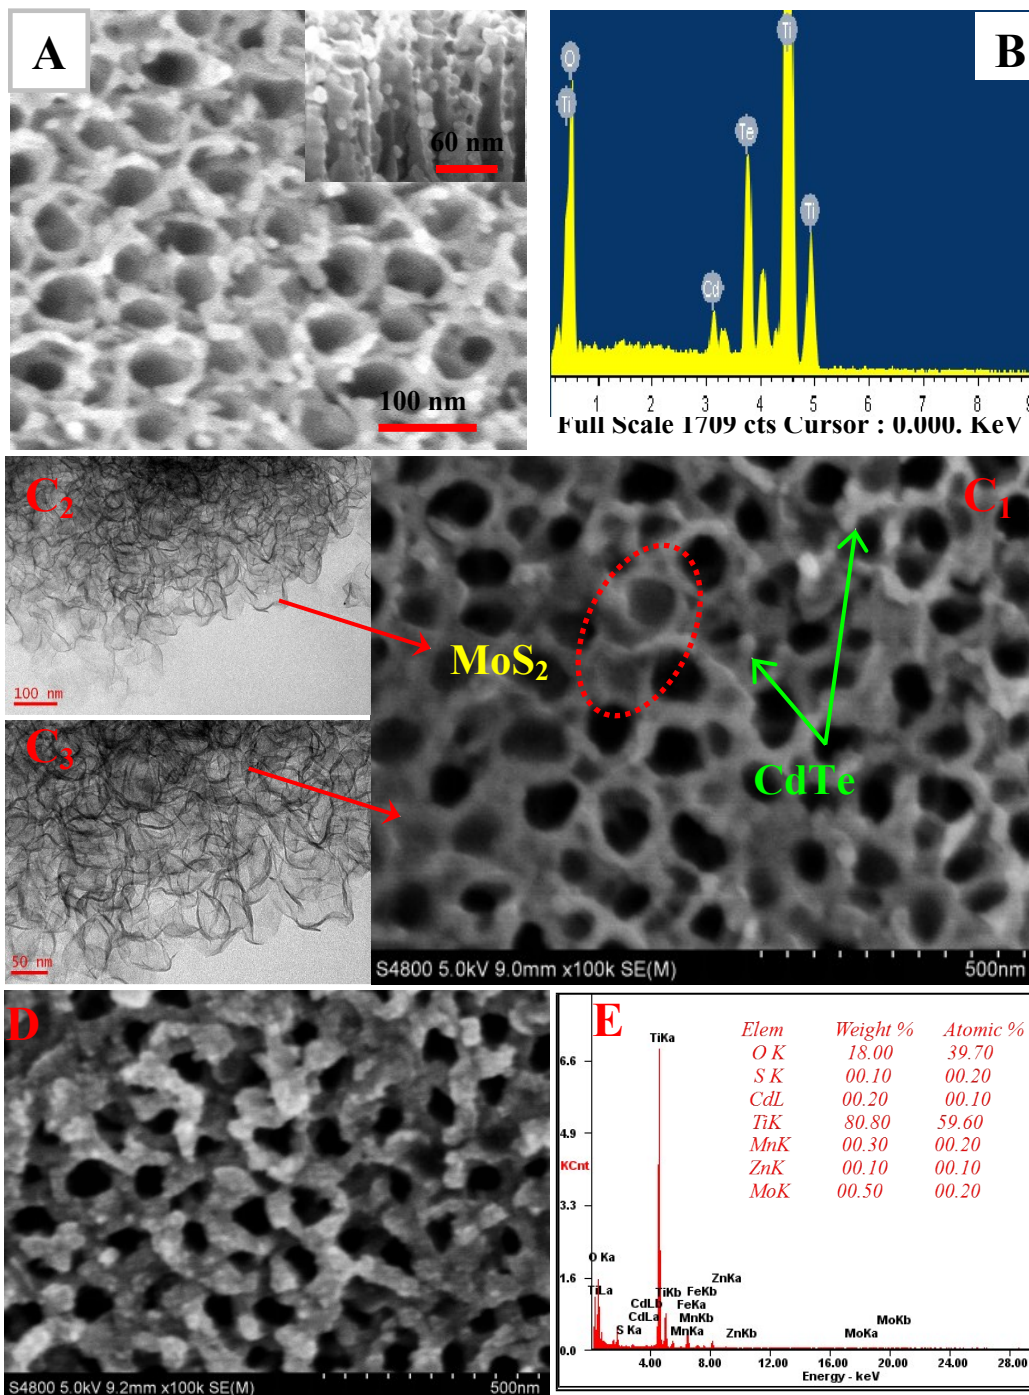

Fig. S-1†: (A) SEM of CdTe / TiO<sub>2</sub>, the inset is the corresponding cross-section view. (B) EDX analysis of Cd, Te, O and Ti elements in the CdTe / TiO<sub>2</sub>. SEM images of MoS<sub>2</sub>/CdTe/TiO<sub>2</sub> NTAs (C<sub>1</sub>) and ZnS/CdS-Mn/MoS<sub>2</sub>/CdTe/TiO<sub>2</sub> NTAs (D). TEM images of the MoS<sub>2</sub> (marked with arrows and circle in red) under the different sizes of amplification (C<sub>2</sub> to C<sub>3</sub>). (E) The corresponding EDX analysis of (D).

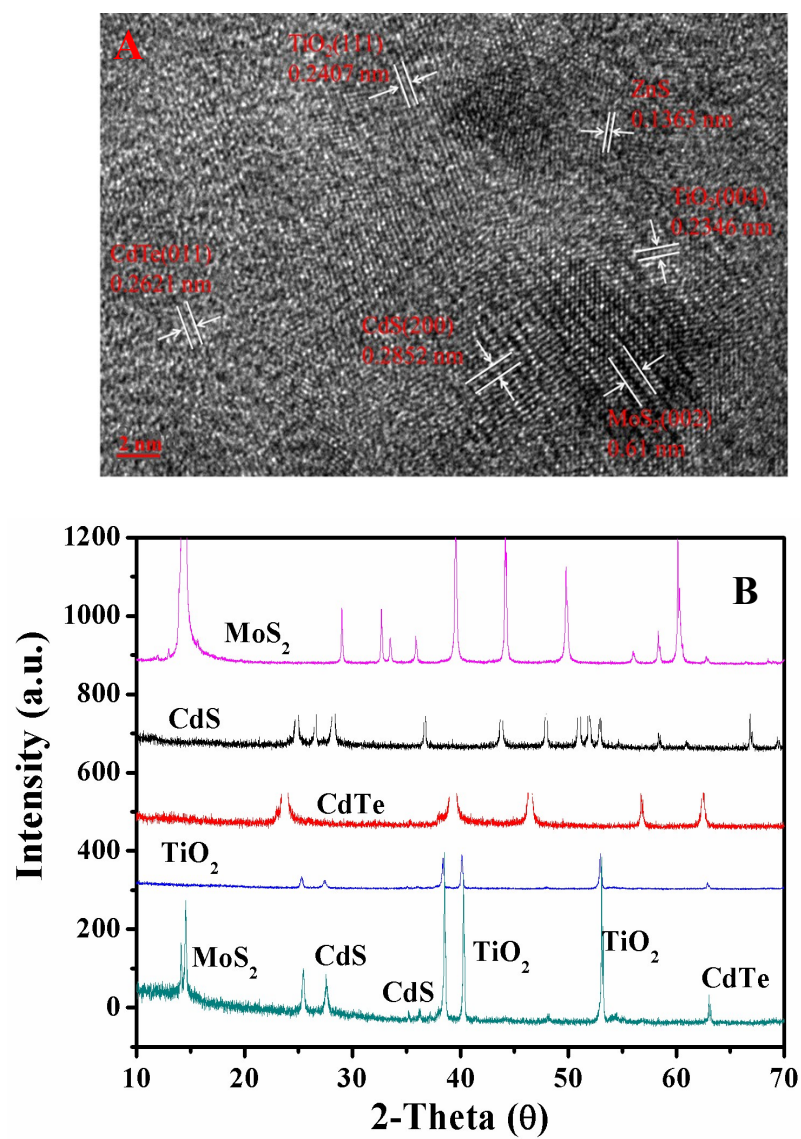

Fig. S-2<sup>†</sup>: HRTEM images of ZnS/CdS-Mn/MoS<sub>2</sub>/CdTe/TiO<sub>2</sub> NTAs (A). The corresponding XRD patterns (B).

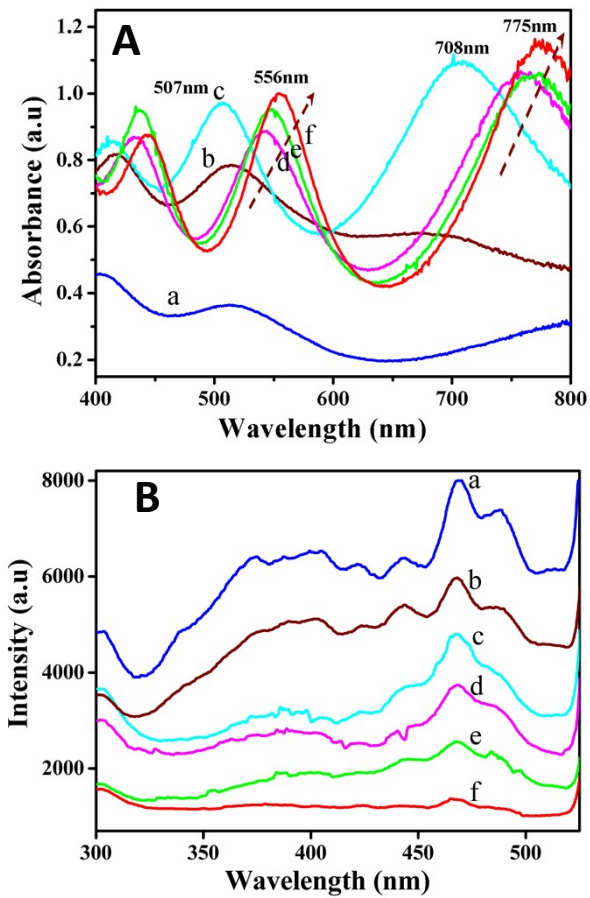

Fig. S-3<sup>†</sup>: (A) Diffuse reflectance absorption spectra of (a) TiO<sub>2</sub> NTAs; (b) CdTe/TiO<sub>2</sub> NTAs; (c) MoS<sub>2</sub>/CdTe/TiO<sub>2</sub> NTAs; (d) CdS-Mn/MoS<sub>2</sub>/CdTe/TiO<sub>2</sub> NTAs; (e) ZnS/MoS<sub>2</sub>/CdTe/TiO<sub>2</sub> NTAs; (f) ZnS/CdS-Mn/MoS<sub>2</sub>/CdTe/TiO<sub>2</sub> NTAs. (B) The corresponding PL spectra.

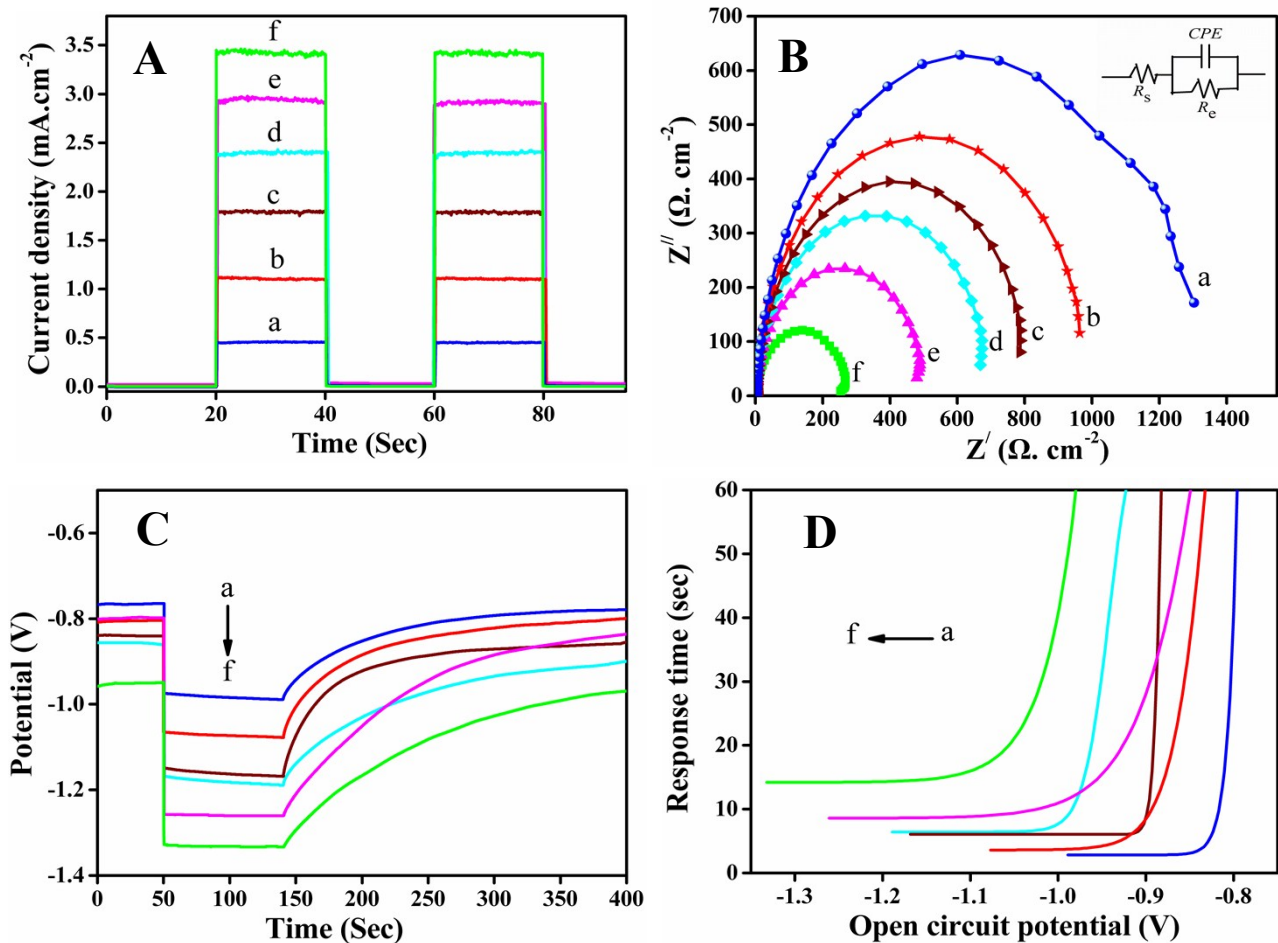

Fig. S-4†: (A) Photocurrent responses of pure TiO<sub>2</sub> NTAs (a); CdTe/TiO<sub>2</sub> NTAs (b); MoS<sub>2</sub>/CdTe/TiO<sub>2</sub> NTAs (c); CdS-Mn/MoS<sub>2</sub>/CdTe/TiO<sub>2</sub> NTAs (d); ZnS/MoS<sub>2</sub>/CdTe/TiO<sub>2</sub> NTAs (e) and ZnS/CdS-Mn/MoS<sub>2</sub>/CdTe/TiO<sub>2</sub> NTAs electrodes (f). (B) The corresponding EIS analysis. (C) open-circuit photovoltage responses of these electrodes. (D) Response time determined by open-circuit potential decay for corresponding photoelectrodes shown in (C).

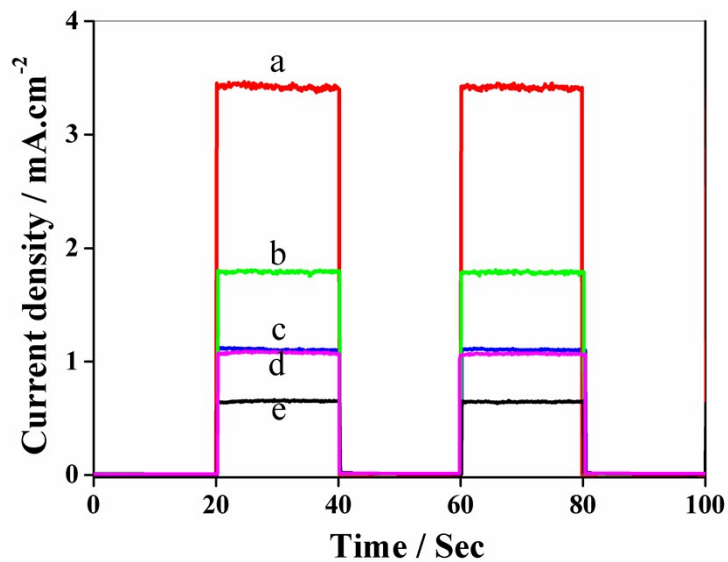

Fig. S-5<sup>†</sup>: Photocurrent responses of ZnS/CdS-Mn/MoS<sub>2</sub>/CdTe/TiO<sub>2</sub> NTAs photoelectrode in 0.1 M phosphate buffer solution (PBS pH =7.4): (a) before and (b) after antibody immobilization; (c) after further anchoring OVA; (d) in the absence and (e) presence of 5×10<sup>-8</sup> M TBC.
